# Supplementary material for: Genome-wide analysis of condensin binding in Caenorhabditis elegans
Source: Genome Biol. 2013 Oct 14;14(10):R112. doi: 10.1186/gb-2013-14-10-r112 (PMC3983662; doi:10.1186/gb-2013-14-10-r112)
Supplement: Additional file 2 — Contains the antibody validation experiments, and primers for ChIP real time PCR analysis. [file gb-2013-14-10-r112-S2.pdf]

## Antibodies used

| Target  | Antibody     | Pubmed PMID | Novus Biologicals Cat # |
|---------|--------------|-------------|-------------------------|
| MIX-1   | JL0004       | 19853451    |                         |
| MIX-1   | SDQ4107      |             |                         |
| MIX-1   | SDQ3892      |             |                         |
| DPY-26  | JL00003      | 19853451    |                         |
| DPY-26  | SDQ4496      |             |                         |
| DPY-26  | SDQ4561      |             |                         |
| CAPG-1  | SDQ3967      |             | 48460002                |
| CAPG-1  | SDQ3990      |             | 53230002                |
| DPY-28  | SDQ4564      |             |                         |
| DPY-28  | KH-DPY28     | 19119011    |                         |
| DPY-27  | JL00001      | 17293863    |                         |
| DPY-27  | SDQ3995      |             |                         |
| SMC-4   | OD0039       |             |                         |
| SMC-4   | KH-SMC4      | 19119011    |                         |
| KLE-2   | SDQ3898      |             |                         |
| KLE-2   | SDQ3942      |             | 48530002                |
| HCP-6   | KH-HCP6      | 19119011    |                         |
| CAPG-2  | SDQ4484      |             |                         |
| CAPG-2  | SDQ4567      |             |                         |
| PQN-85  | SDQ4481      |             | 53320002                |
| AMA1    | Q2358        |             | 38520002                |
| AMA1    | Q2357        |             |                         |
| HTZ1 BK | BK00001_HTZ1 | 18787694    |                         |

For antibodies that are not characterized before, we used western blot, immunoprecipitation analysis and RNAi for validation. The following slides summarizes information for each antibody and shows co-immunoprecipitation between condensin subunits. If an antibody immunoprecipitated the correct target as a single or the primary band on a western blot, and the signal is specific tested by immunoprecipitation, and/or knockdown by RNAi, and the ChIP-seq data is reproducible and correlates with ChIP-seq data from an independent antibody to the same target (if available), then the data from that antibody was used.

# DPY-27

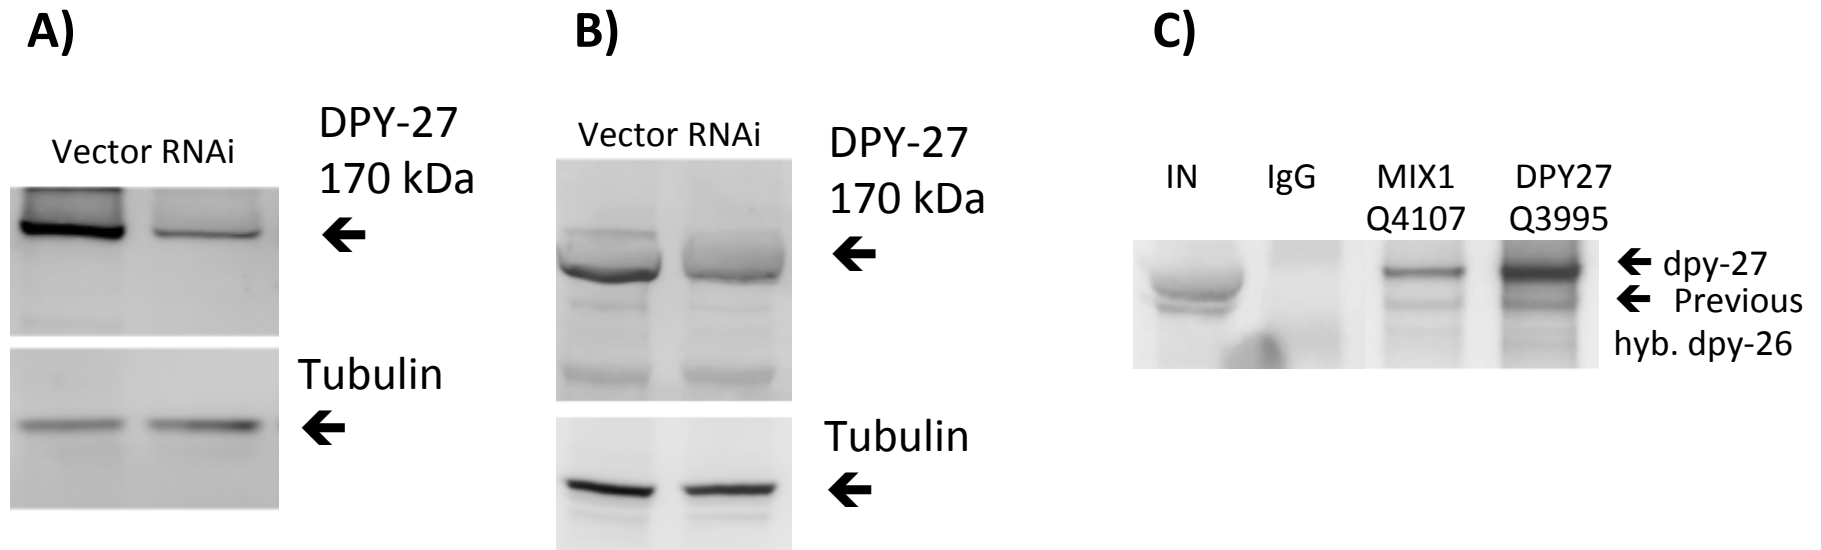

Figure 1: RNAi depletion of DPY-27 show reduction in DPY-27 signal using  
A) DPY-27 JL and B) SDQ3995 antibodies. C) DPY-27 SDQ3995 antibody immunoprecipitates  
DPY-27 and DPY-26.

# CAPG-1

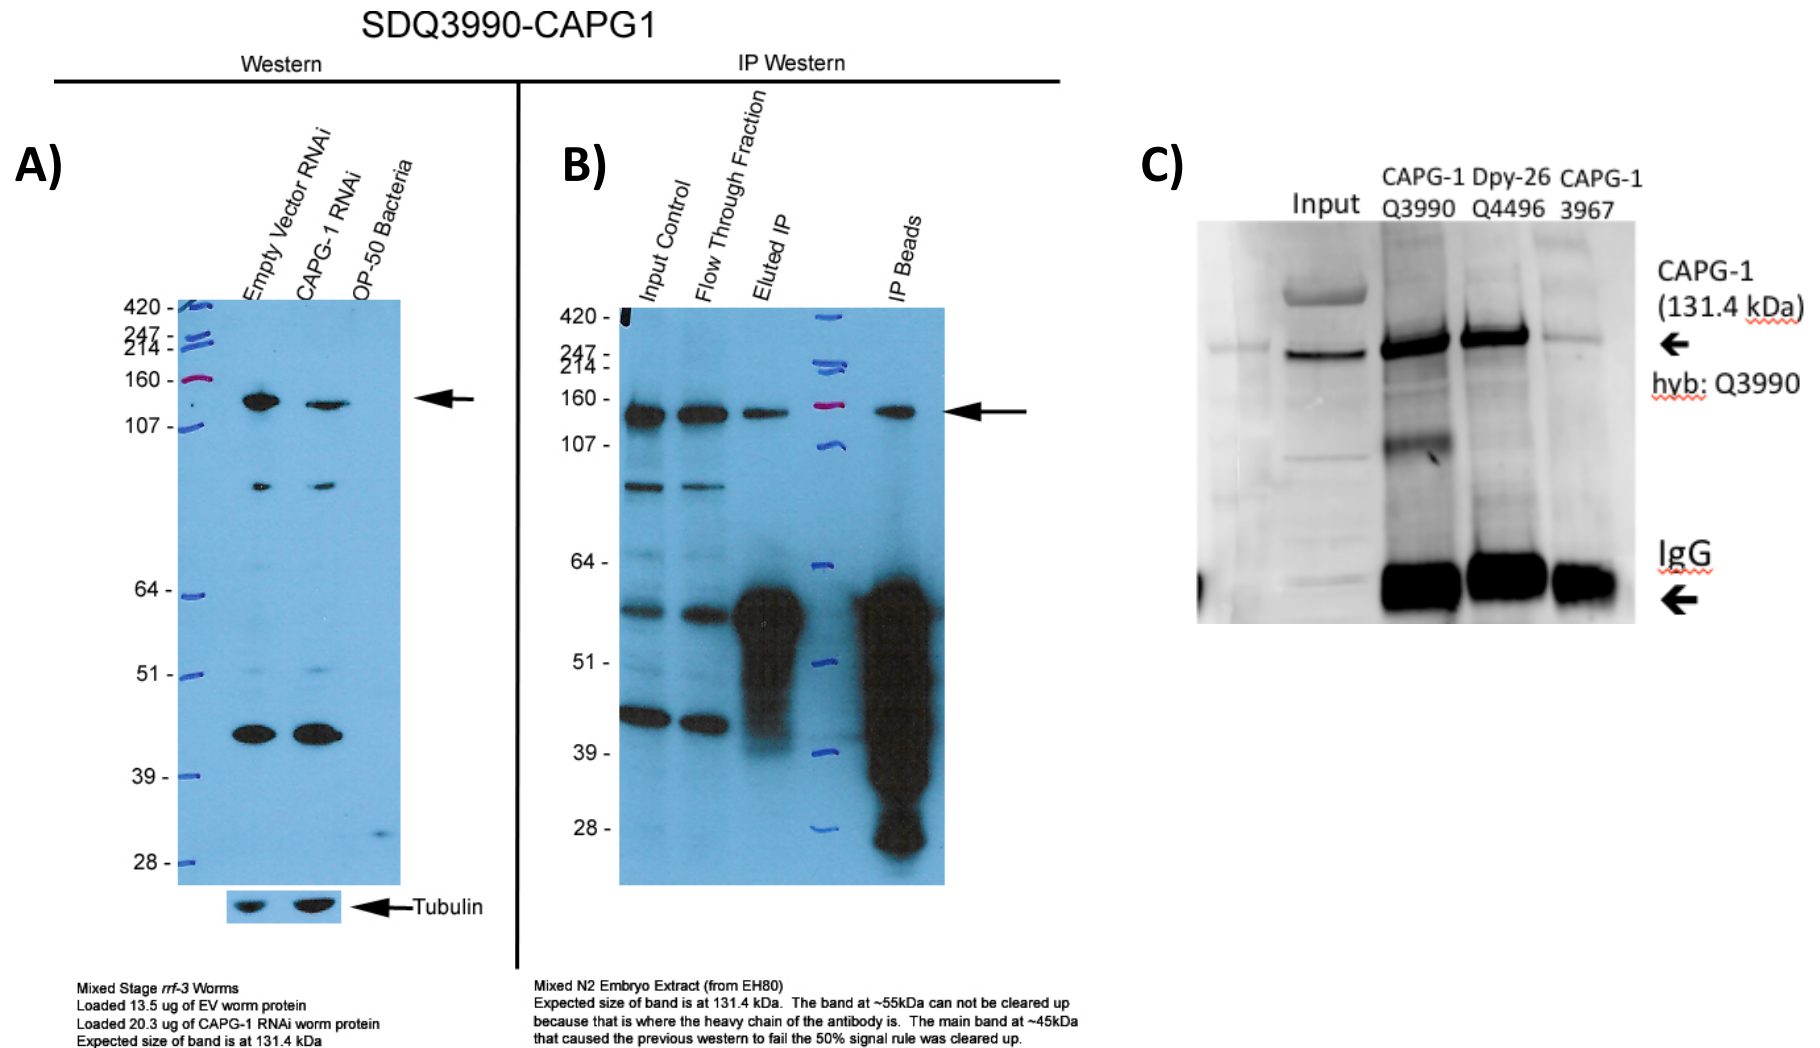

Figure 2: **A)** RNAi depletion of CAPG-1 show reduction in SDQ3990 signal. **B)** SDQ3990 and **C)** CAPG-1 SDQ3967 immunoprecipitates CAPG-1.

# DPY-28 and HCP-6

## SDQ4564-DPY28

Mixed Stage N2 and TY148 worms  
Loaded 19 ug of N2 worm protein  
Loaded 29 ug of TY148 worm protein  
Expected Size of band is at 171 kDa  
Dilution: 1:1,000

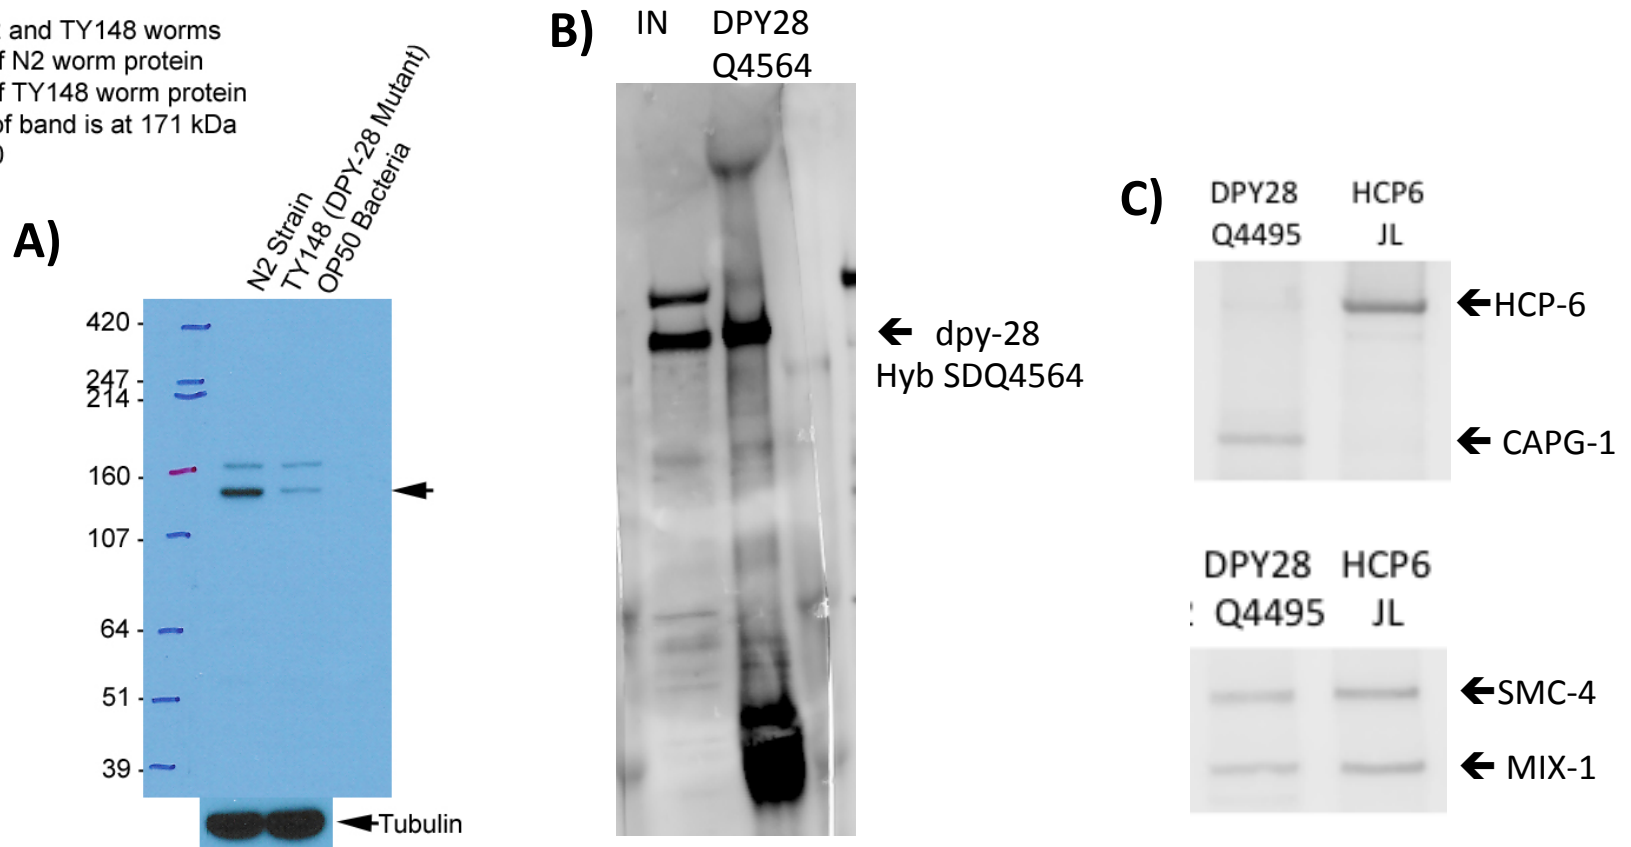

Figure 3: **A)** RNAi depletion of DPY-28 shows reduction of one band in SDQ4564 signal. **B)** DPY-28 SDQ4564 immunoprecipitates DPY-28 band and not the second band that is in the input. **C)** DPY-28 SDQ4495 does not immunoprecipitate HCP-6. HCP-6 JL immunoprecipitates SMC-4 and MIX-1, but does not immunoprecipitate condensin I- $I^{DC}$  subunit CAPG-1.

# DPY-26

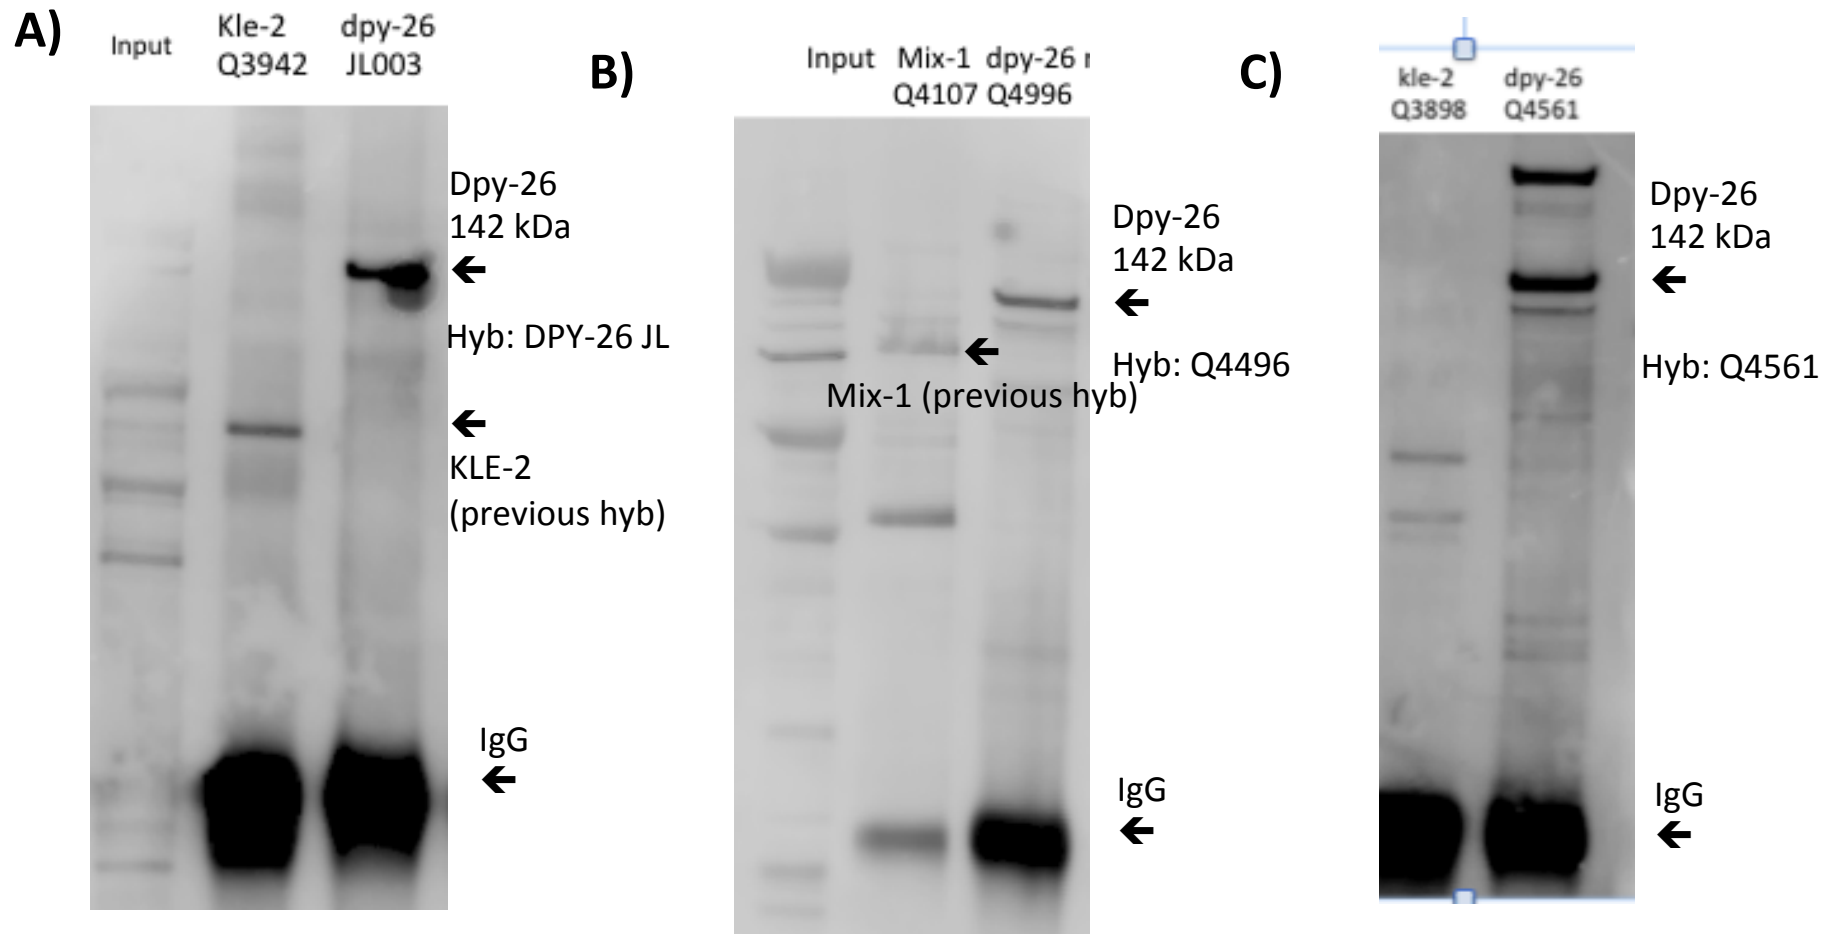

Figure 4: **A)** DPY-26 JL immunoprecipitates DPY-26. KLE-2 SDQ3942 does not immunoprecipitate condensin I-IDC subunit DPY-26. **B)** DPY-26 SDQ4496 immunoprecipitates specifically DPY-26. **C)** DPY-26 SDQ4561 immunoprecipitates DPY-26 but there is a non specific band for this particular antibody.

# CAPG-2

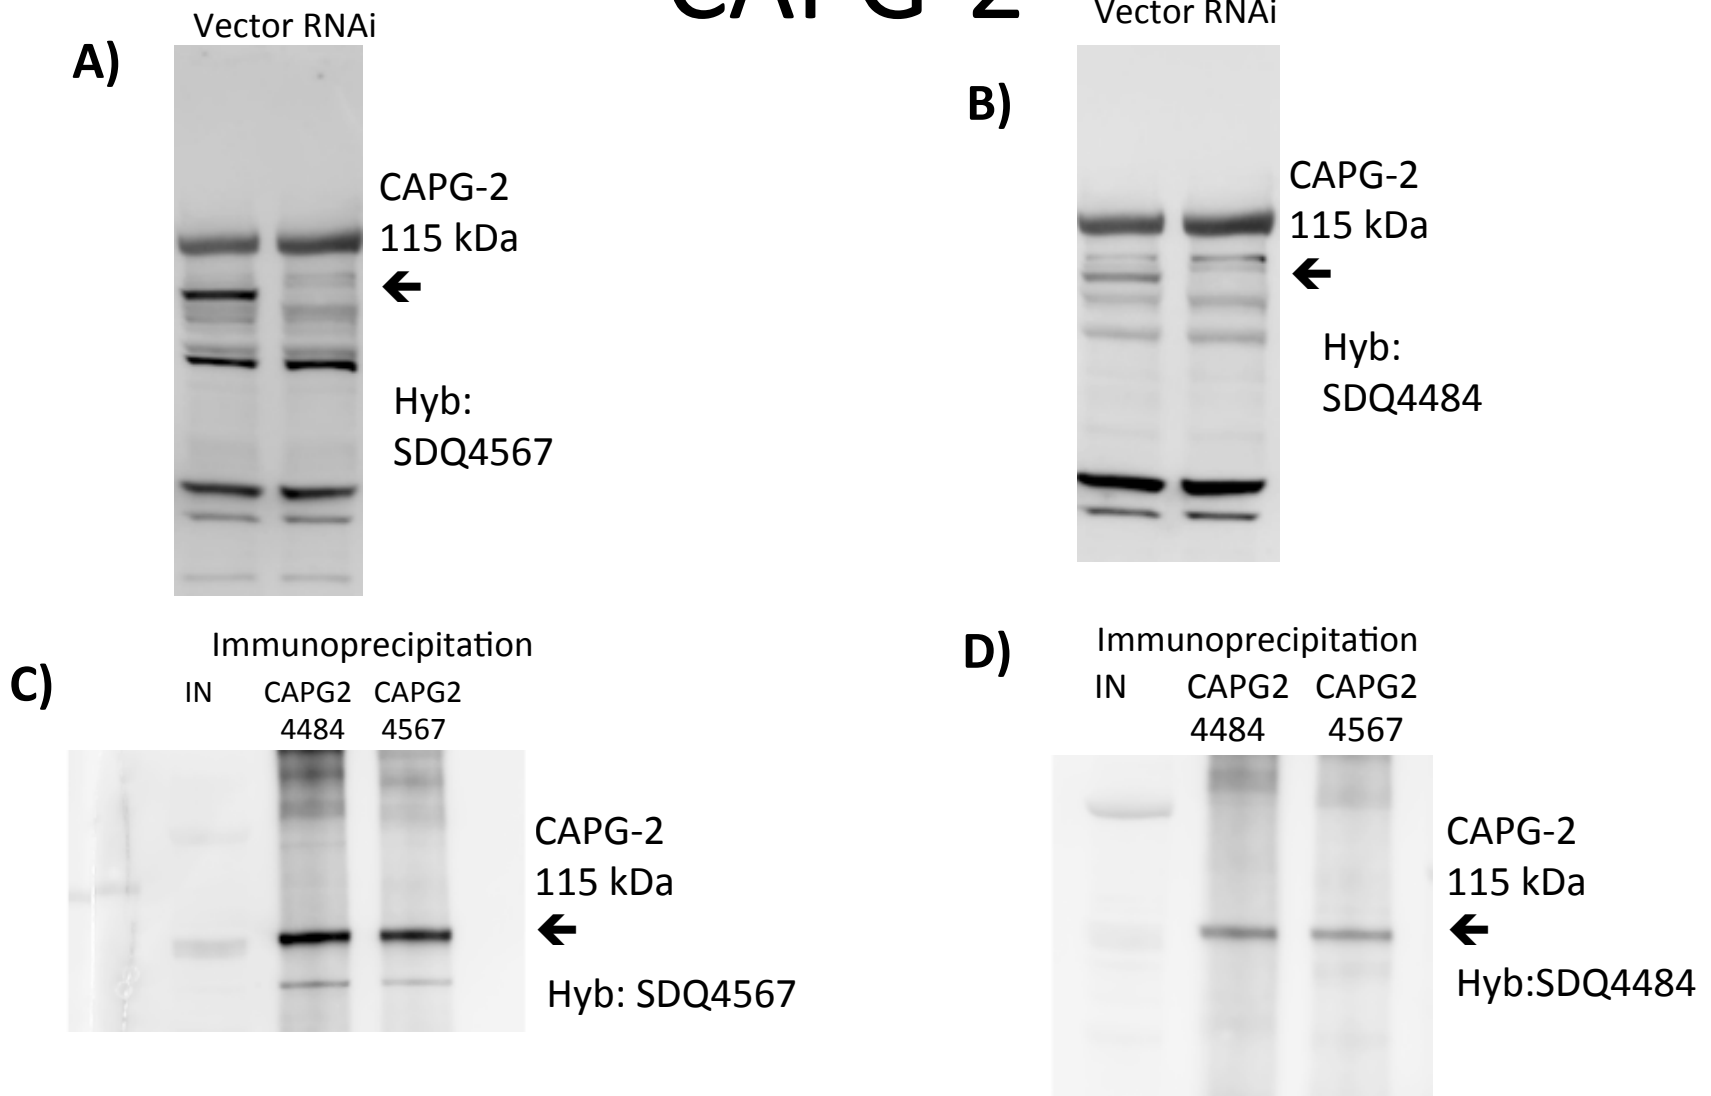

Figure 5:RNAi depletion of CAPG-2 shows reduction in **A)** SDQ4567 and **B)** SDQ4484 signal. **C)** SDQ4567 and **D)** SDQ4484 immunoprecipitate CAPG-2. CAPG-2 SDQ4567 shows a background band that is not there for SDQ4484.

# KLE-2

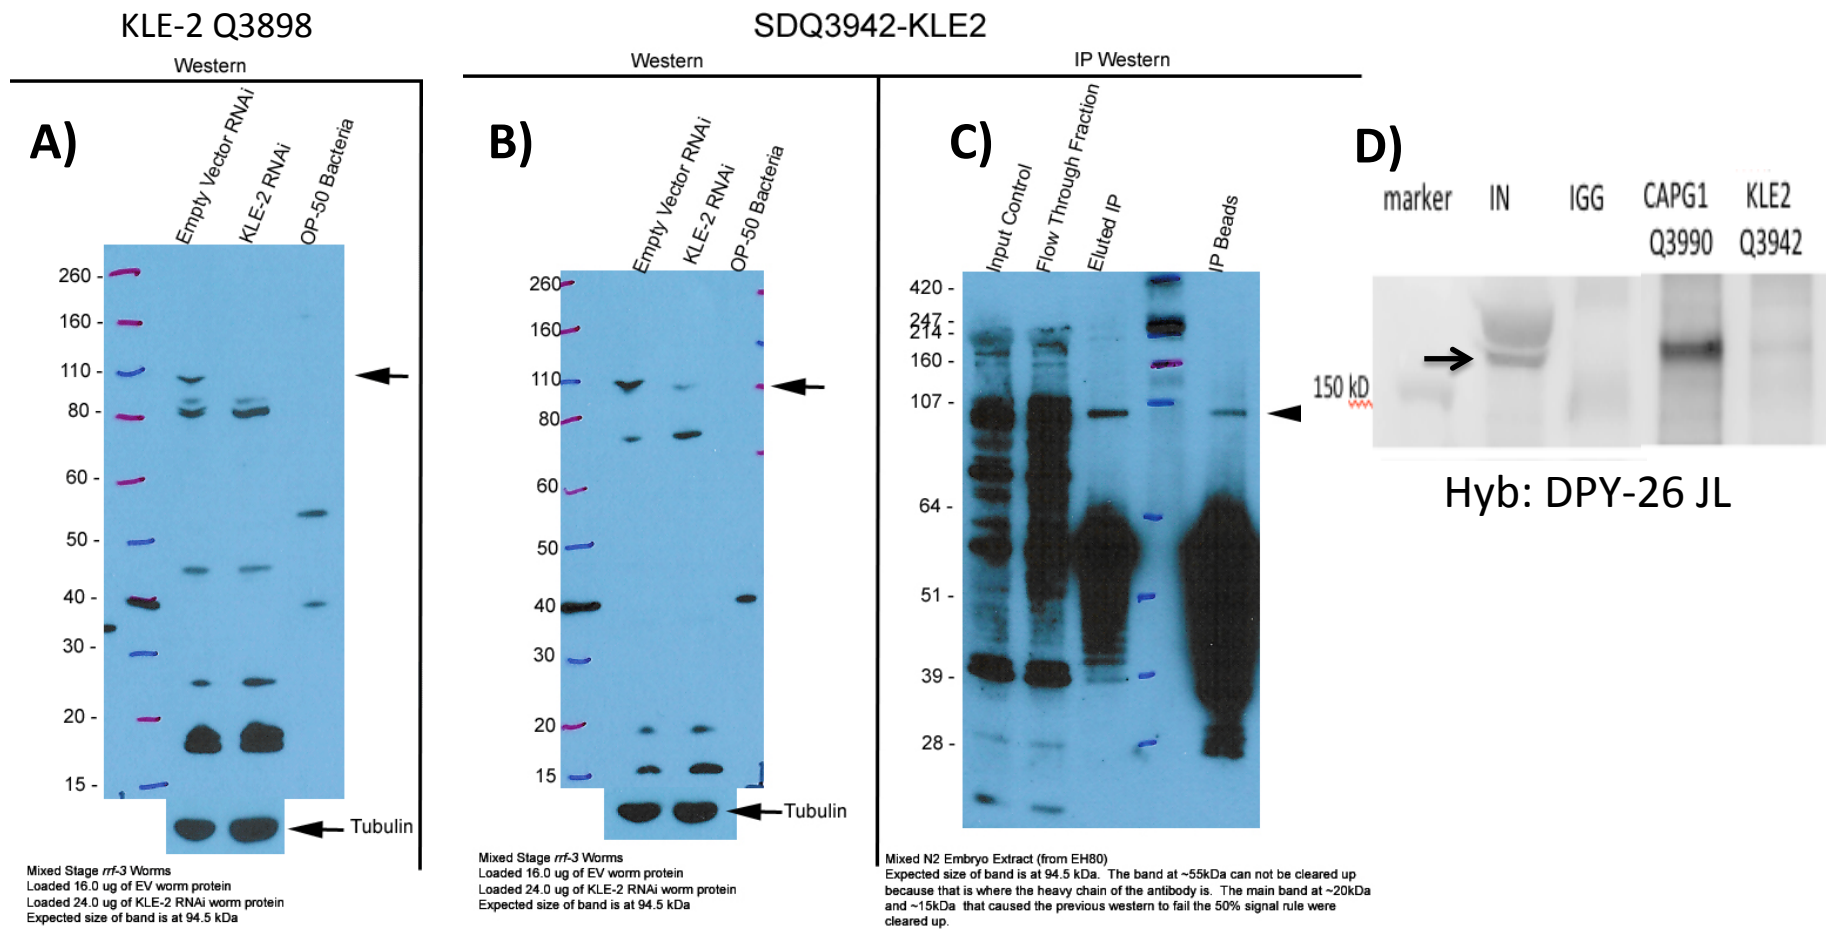

Figure 5: RNAi depletion of KLE-2 shows reduction in **A)** SDQ3898 and **B)** SDQ3942 signal. **C)** SDQ3942 immunoprecipitate specifically KLE-2 **D)** , and not DPY-26.

# SMC-4

**A)**

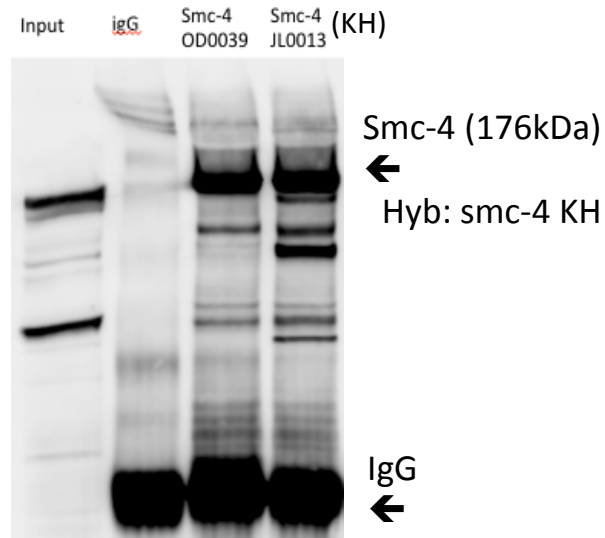

**B)**

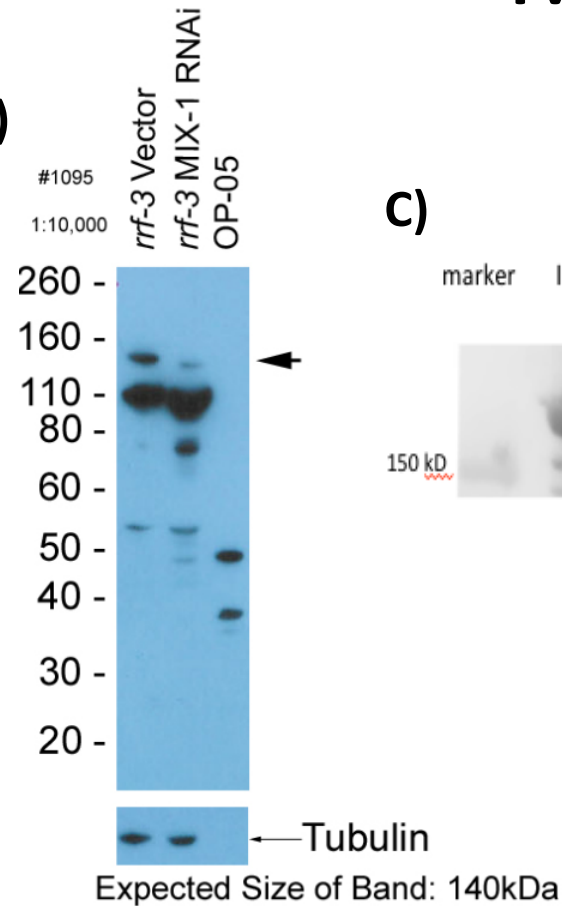

# MIX-1

**C)**

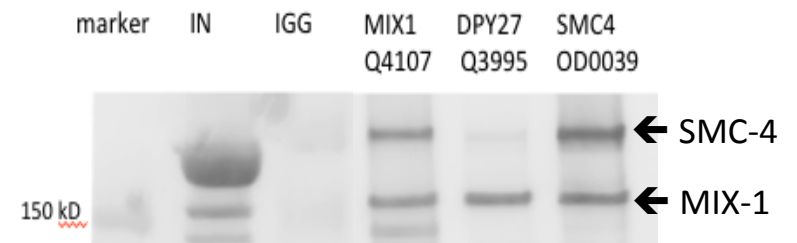

Figure 6:**A)** SMCOD0039 immunoprecipitates SMC-4. SMC-4 KH is previously characterized (see supplemental table 1). **B)** RNAi depletion of MIX-1 shows reduction in MIX-1 signal in SDQ4107. **C)** SMC-4 and MIX-1 co-immunoprecipitate.

# PQN-85 (SCC-2)

SDQ4481-PQN85

Expected size of band: 252.8 kDa

1:5000 dilution

*rrf-3* worms harvested at 1st generation gravid

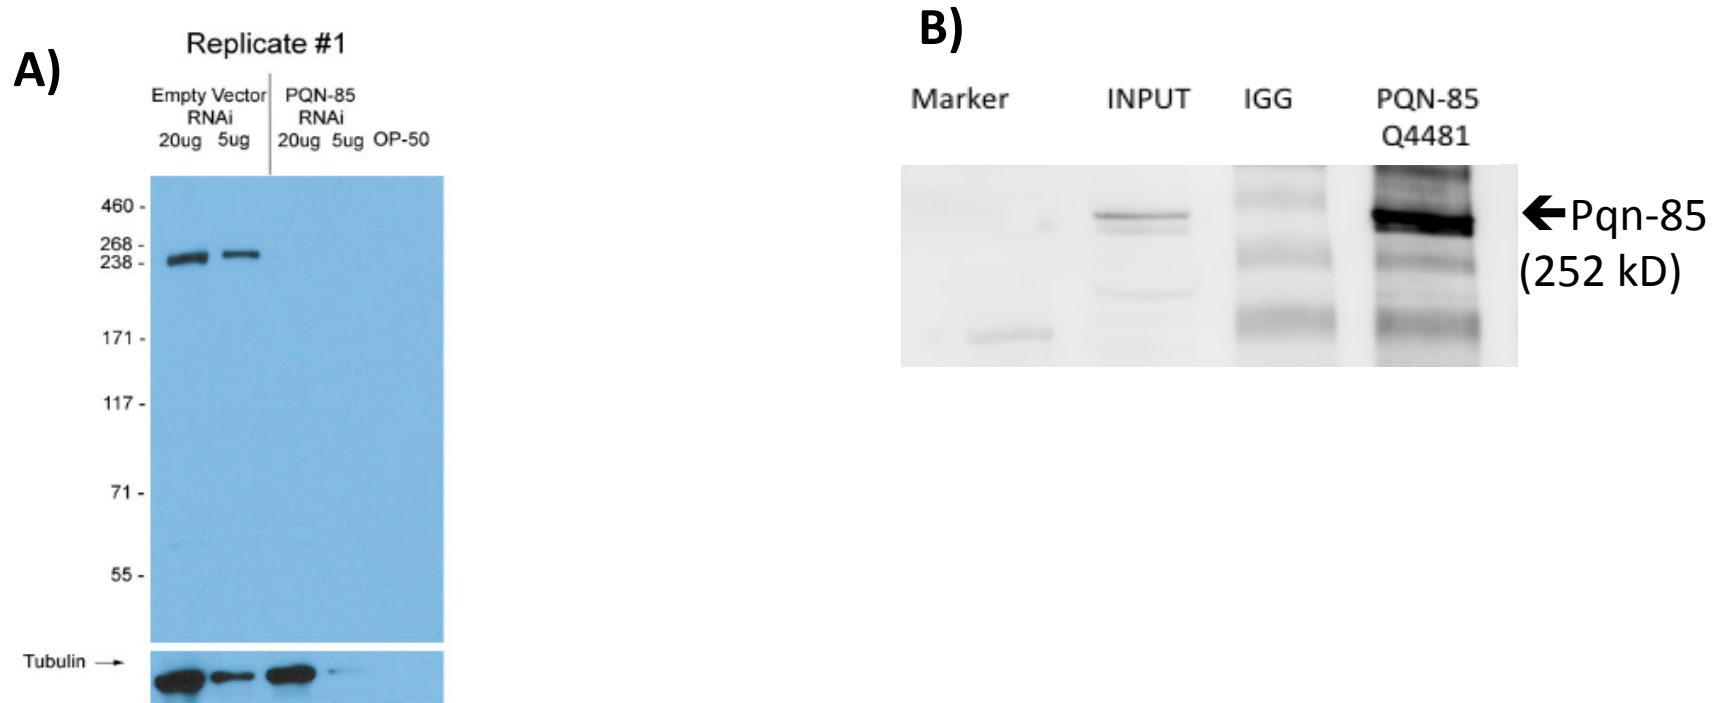

Figure 7: **A)** RNAi depletion of PQN-85 shows reduction in PQN-85 signal in SDQ4481. **B)** SDQ4481 immunoprecipitates PQN-85.

qPCR primers:

|                      |                      |                  |
|----------------------|----------------------|------------------|
| GCCCGTCTATGTCGTCTCTT | GCAGTCCTCCTCATCCTTCA | dpy-23 promoter  |
| CGTGCGTACAAAAGGAGACA | CTTTCCCCTGCCCAATTACC | rex-1            |
| AGAAAATGCGCACACAAACG | TAATGTTTAGGCGGCAGGGA | rex-2            |
| AGTTTGCAATCGGTGTGTCG | GTCGAGCACTTGTGAGGAAG | negative control |
