# Supplementary material for: Genome-wide analysis of condensin binding in Caenorhabditis elegans
Source: PubMed Central journal article supplement (PMC3983662; doi:10.1186/gb-2013-14-10-r112), 2013-10-14
Supplement: gb-2013-14-10-r112-S4.pdf [file gb-2013-14-10-r112-S4.pdf]

# Supplemental Figure 2

A)

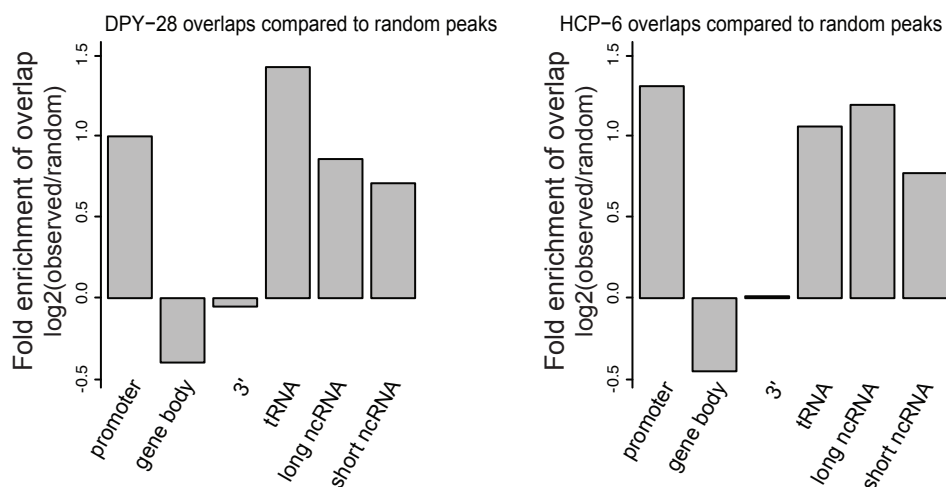

B)

|                      | X chromosome         |    |       | on X                | X chromosome              |    |       |
|----------------------|----------------------|----|-------|---------------------|---------------------------|----|-------|
|                      | Percentage of Peaks* |    |       |                     | Percentage of Annotation* |    |       |
|                      | I, I <sup>DC</sup>   | II | SCC-2 | annotation coverage | I, I <sup>DC</sup>        | II | SCC-2 |
| <b>1 kb promoter</b> | 43                   | 56 | 46    | 15                  | 28                        | 5  | 6     |
| <b>gene body</b>     | 43                   | 35 | 35    | 53                  | 22                        | 3  | 4     |
| <b>1 kb down</b>     | 18                   | 18 | 19    | 15                  | 12                        | 1  | 2     |
| <b>intergenic</b>    | 14                   | 15 | 16    | 19                  |                           |    |       |
| <b>short ncRNA</b>   | 26                   | 27 | 32    | 16                  | 39                        | 5  | 7     |
| <b>long ncRNA</b>    | 9                    | 10 | 11    | 5.5                 | 44                        | 5  | 10    |
| <b>tRNA</b>          | 8                    | 10 | 13    | 2.4                 | 58                        | 11 | 20    |

  

|                      | Autosomes            |    |       | on Aut              | Autosomes                 |    |       |
|----------------------|----------------------|----|-------|---------------------|---------------------------|----|-------|
|                      | Percentage of Peaks* |    |       |                     | Percentage of Annotation* |    |       |
|                      | I, I <sup>DC</sup>   | II | SCC-2 | annotation coverage | I, I <sup>DC</sup>        | II | SCC-2 |
| <b>1 kb promoter</b> | 48                   | 65 | 48    | 19                  | 0.2                       | 6  | 3     |
| <b>gene body</b>     | 58                   | 51 | 51    | 63                  | 0.2                       | 3  | 3     |
| <b>1 kb down</b>     | 35                   | 27 | 24    | 20                  | 0.1                       | 2  | 1     |
| <b>intergenic</b>    | 0                    | 10 | 13    | 13                  |                           |    |       |
| <b>short ncRNA</b>   | 0                    | 18 | 22    | 8                   | 0.6                       | 6  | 7     |
| <b>long ncRNA</b>    | 0                    | 8  | 10    | 2.7                 | 1.3                       | 11 | 11    |
| <b>tRNA</b>          | 8                    | 2  | 4     | 0.7                 | 1.2                       | 6  | 13    |
