# Supplementary material for: Genome-wide analysis of condensin binding in Caenorhabditis elegans
Source: PubMed Central journal article supplement (PMC3983662; doi:10.1186/gb-2013-14-10-r112), 2013-10-14

# Supplemental Figure 5

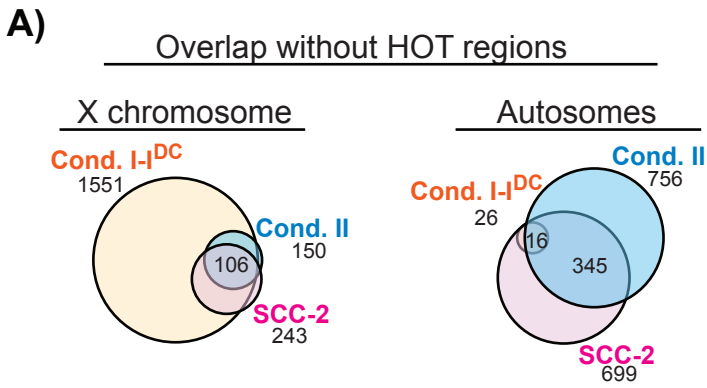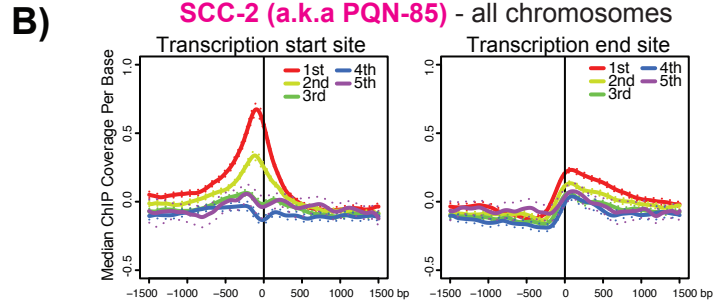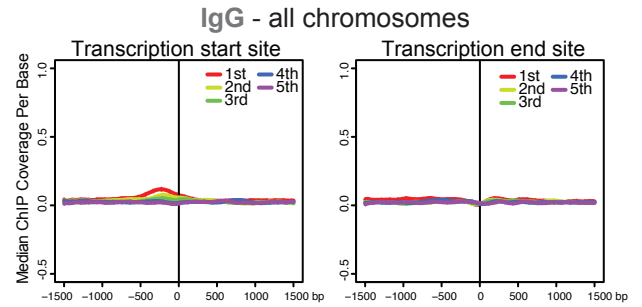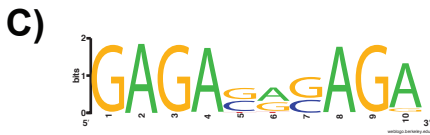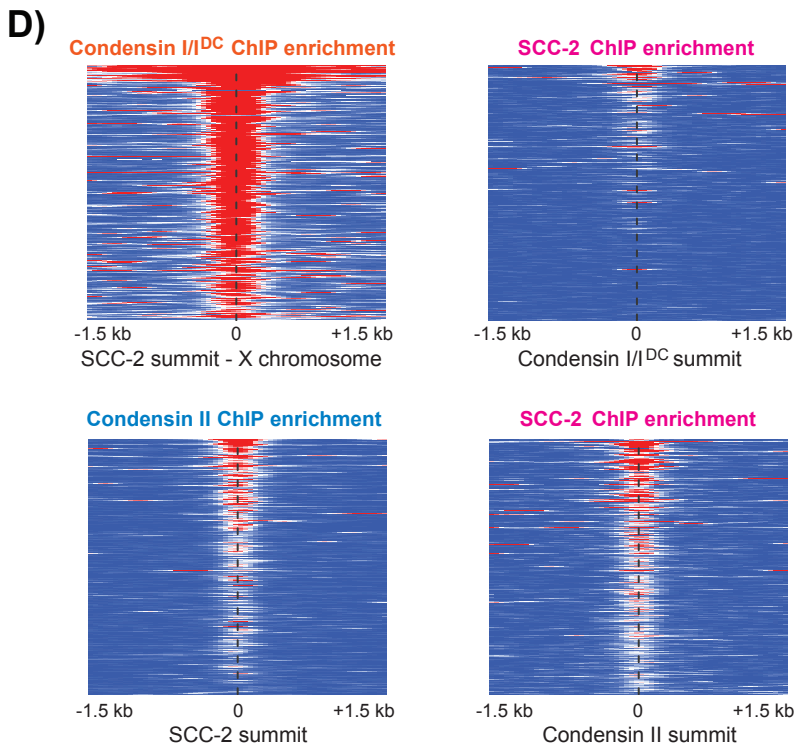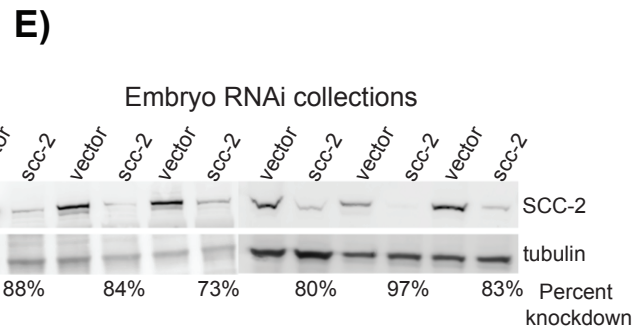

Supplement: gb-2013-14-10-r112-S9.pdf [file gb-2013-14-10-r112-S9.pdf]
